# Supplementary material for: Assessing and Resolving Model Misspecifications in Metabolic Flux Analysis
Source: MDPI journal article supplement (doi:10.3390/bioengineering4020048), 2017-05-24
Supplement: s1 [file s1]

# Supplementary Material for Assessing and Resolving Model Misspecifications in Metabolic Flux Analysis

Rudiyanto Gunawan and Sandro Hutter

Institute for Chemical and Bioengineering, ETH Zurich, Zurich, Switzerland

Swiss Institute of Bioinformatics, Lausanne, Switzerland

**Table S1.** Metabolic reactions and exchange fluxes in the Chinese hamster ovary metabolic model (adapted from [16,25]).

| #  | Formula |   |          |   |         |   |          |   |        |   |          |
|----|---------|---|----------|---|---------|---|----------|---|--------|---|----------|
| 1  | Glc     | → | G6P      |   |         |   |          |   |        |   |          |
| 2  | G6P     | → | 2 DHAP   |   |         |   |          |   |        |   |          |
| 3  | DHAP    | → | Pyr      |   |         |   |          |   |        |   |          |
| 4  | G6P     | → | R5P      |   |         |   |          |   |        |   |          |
| 5  | Pyr     | → | Lac      |   |         |   |          |   |        |   |          |
| 6  | mAcCoA  | → | AcOH     |   |         |   |          |   |        |   |          |
| 7  | Mal     | → | Pyr      |   |         |   |          |   |        |   |          |
| 8  | mPyr    | → | mAcCoA   |   |         |   |          |   |        |   |          |
| 9  | mAcCoA  | + | mOxal    | → | mCit    |   |          |   |        |   |          |
| 10 | mCit    | → | mαKG     |   |         |   |          |   |        |   |          |
| 11 | mαKG    | → | mSucCoA  |   |         |   |          |   |        |   |          |
| 12 | mSucCoA | → | mSuc     |   |         |   |          |   |        |   |          |
| 13 | mSuc    | → | mMal     |   |         |   |          |   |        |   |          |
| 14 | mMal    | → | mOxal    |   |         |   |          |   |        |   |          |
| 15 | Oxal    | → | Mal      |   |         |   |          |   |        |   |          |
| 16 | Glu     | + | Pyr      | → | αKG     | + | Ala      |   |        |   |          |
| 17 | mGlu    | → | Amm      | + | mαKG    |   |          |   |        |   |          |
| 18 | Glu     | + | Amm      | → | Gln     |   |          |   |        |   |          |
| 19 | Glu     | + | Oxal     | → | Asp     | + | αKG      |   |        |   |          |
| 20 | Glu     | → | Pgl      |   |         |   |          |   |        |   |          |
| 21 | Ser     | → | Pyr      | + | Amm     |   |          |   |        |   |          |
| 22 | Ser     | → | Gly      | + | NMFH4   |   |          |   |        |   |          |
| 23 | Amm     | + | NMFH4    | → | Gly     |   |          |   |        |   |          |
| 24 | Thr     | → | Gly      | + | mAcCoA  |   |          |   |        |   |          |
| 25 | Cys     | + | αKG      | → | Glu     | + | Pyr      |   |        |   |          |
| 26 | His     | → | Glu      | + | NMFH4   | + | 2 Amm    |   |        |   |          |
| 27 | Arg     | + | αKG      | → | 2 Glu   |   |          |   |        |   |          |
| 28 | Pro     | → | Glu      |   |         |   |          |   |        |   |          |
| 29 | Asn     | → | Amm      | + | Asp     |   |          |   |        |   |          |
| 30 | Ile     | + | αKG      | → | mSucCoA | + | Glu      | + | mAcCoA |   |          |
| 31 | Leu     | + | αKG      | + | mSucCoA | → | 2 mAcCoA | + | mSuc   | + | Glu      |
| 32 | Lys     | + | αKG      | → | Glu     | + | 2 mAcCoA | + | Amm    |   |          |
| 33 | Met     | + | Ser      | → | mSucCoA | + | Cys      | + | Amm    | + | NMFH4    |
| 34 | Phe     | → | Tyr      |   |         |   |          |   |        |   |          |
| 35 | Trp     | → | 2 mAcCoA | + | Ala     | + | Amm      |   |        |   |          |
| 36 | Tyr     | + | αKG      | + | mSucCoA | → | Glu      | + | Mal    | + | 2 mAcCoA |
|    |         | + | mSuc     |   |         |   |          |   |        |   |          |
| 37 | Val     | + | αKG      | → | mSucCoA | + | Glu      |   |        |   |          |

|    |           |   |           |   |           |   |             |   |                       |
|----|-----------|---|-----------|---|-----------|---|-------------|---|-----------------------|
| 38 | G6P       | → | Carb      |   |           |   |             |   |                       |
| 39 | 9 mCit    | + | 9 Mal     | → | OA        | + | 9 mMal      | + | 9 Oxal                |
| 40 | 1.9 Gln   | + | 1.3 Asp   | + | 0.5 Gly   | + | 1.3 NMFH4   | + | R5P → 1.9 Glu         |
|    |           | + | 0.8 Mal   | + | DNA       |   |             |   |                       |
| 41 | 2.091 Gln | + | 1.194 Asp | + | 0.489 Gly | + | 0.978 NMFH4 | + | R5P → 2.091 Glu       |
|    |           | + | 0.683 Mal | + | RNA       |   |             |   |                       |
| 42 | 0.095 Ala | + | 0.048 Asp | + | 0.039 Asn | + | 0.063 Arg   | + | 0.028 Cys + 0.052 Gln |
|    |           | + | 0.064 Glu | + | 0.078 Gly | + | 0.022 His   | + | 0.052 Ile + 0.088 Leu |
|    |           | + | 0.089 Lys | + | 0.02 Met  | + | 0.021 Phe   | + | 0.028 Pro + 0.057 Ser |
|    |           | + | 0.061 Thr | + | 0.006 Trp | + | 0.02 Tyr    | + | 0.059 Val → Prot      |
| 43 | mMal      | + | αKG       | → | mαKG      | + | Mal         |   |                       |
| 44 | mMal      | + | Cit       | → | mCit      | + | Mal         |   |                       |
| 45 | Glu       | → | mGlu      |   |           |   |             |   |                       |
| 46 | Pyr       | → | mPyr      |   |           |   |             |   |                       |
| 47 | FoOH      | → | NMFH4     |   |           |   |             |   |                       |

| Exchange Fluxes | Measured | Standard deviation |
|-----------------|----------|--------------------|
| → Ala           | -34.9    | 1.34               |
| → 2 Cys         | 0.33     | 0.06               |
| → Gly           | -2.39    | 0.22               |
| → Ser           | 2.48     | 0.37               |
| → Thr           | 1.59     | 0.17               |
| → Arg           | 2.38     | 0.39               |
| → Glu           | -0.34    | 0.41               |
| → Gln           | 7.08     | 1.02               |
| → His           | 0.97     | 0.15               |
| → Pro           | 1.93     | 0.15               |
| → Asp           | 2.04     | 0.13               |
| → Asn           | 2.24     | 0.20               |
| → Ile           | 1.41     | 0.11               |
| → Leu           | 2.61     | 0.25               |
| → Lys           | 1.69     | 0.12               |
| → Met           | 0.86     | 0.05               |
| → Phe           | 1.15     | 0.08               |
| → Trp           | 0.32     | 0.07               |
| → Tyr           | 1.05     | 0.07               |
| → Val           | 2.18     | 0.13               |
| → Lac           | -291     | 10.9               |
| → Glc           | 161      | 3.93               |
| → Amm           | -17.8    | 4.08               |
| → Carb          | -2.14    | 0.27               |
| → OA            | -1.37    | 0.17               |
| → DNA           | -0.31    | 0.04               |
| → RNA           | -0.93    | 0.11               |
| → Prot          | -32.9    | 4.64               |
| → Ala + Gln     | 18.3     | 1.96               |
| → FoOH          | -7.75    | 0.19               |
| → AcOH          | -1.07    | 0.06               |
| → Pyr           | -2.83    | 0.17               |
| → Cit           | -1.61    | 0.11               |
| → Pgl           | -4.00    | 0.17               |

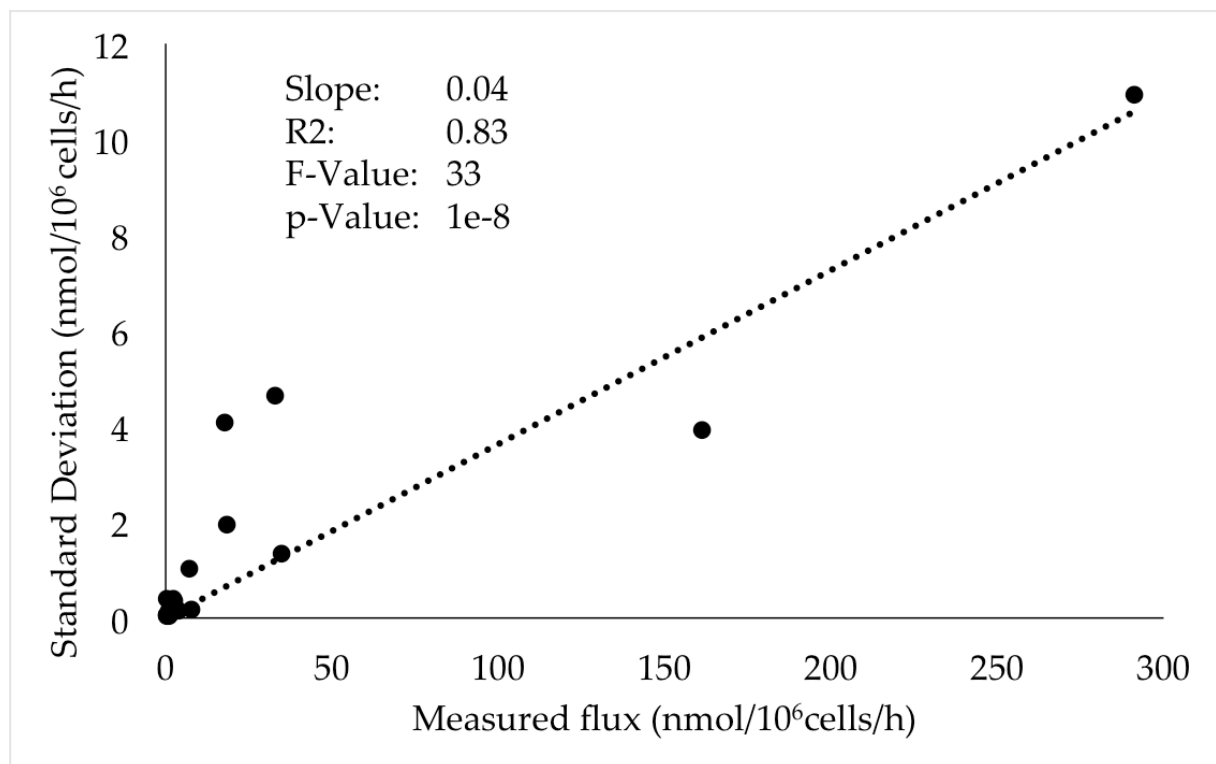

**Figure S1** Coefficient of variation analysis of the measured exchange fluxes in CHO cell culture data [16].

**Table S2.** Intracellular flux estimates (flux distribution) of the CHO cell culture.

| Reaction<br>number | $\hat{v}_{i, \text{GLS}} \left( \frac{\text{nmol}}{1\text{e6cells h}} \right)$ |
|--------------------|--------------------------------------------------------------------------------|
| 1                  | 161.2                                                                          |
| 2                  | 157.8                                                                          |
| 3                  | 315.5                                                                          |
| 4                  | 1.2                                                                            |
| 5                  | 291.2                                                                          |
| 6                  | 1.1                                                                            |
| 7                  | 19.6                                                                           |
| 8                  | 15.0                                                                           |
| 9                  | 12.5                                                                           |
| 10                 | -1.5                                                                           |
| 11                 | 17.8                                                                           |
| 12                 | 17.4                                                                           |
| 13                 | 18.1                                                                           |
| 14                 | 12.5                                                                           |
| 15                 | 12.3                                                                           |
| 16                 | 19.3                                                                           |
| 17                 | -0.2                                                                           |
| 18                 | -21.5                                                                          |
| 19                 | 0.0                                                                            |
| 20                 | 4.0                                                                            |
| 21                 | -6.8                                                                           |
| 22                 | 7.2                                                                            |
| 23                 | -1.3                                                                           |
| 24                 | -0.4                                                                           |
| 25                 | 0.0                                                                            |
| 26                 | 0.3                                                                            |
| 27                 | 0.3                                                                            |
| 28                 | 1.0                                                                            |
| 29                 | 1.0                                                                            |
| 30                 | -0.3                                                                           |
| 31                 | -0.2                                                                           |
| 32                 | -1.2                                                                           |
| 33                 | 0.2                                                                            |
| 34                 | 0.5                                                                            |
| 35                 | 0.1                                                                            |
| 36                 | 0.9                                                                            |
| 37                 | 0.3                                                                            |
| 38                 | 2.1                                                                            |
| 39                 | 1.4                                                                            |
| 40                 | 0.3                                                                            |
| 41                 | 0.9                                                                            |
| 42                 | 32.3                                                                           |
| 43                 | 19.5                                                                           |
| 44                 | -1.6                                                                           |
| 45                 | -0.2                                                                           |
| 46                 | 15.0                                                                           |
| 47                 | -7.8                                                                           |

**Table S3** Case study II: Other misspecification tests using the F-test (values represent rates)

| m   | $n_{vI}$ | $n_{vE}$ | $n_{v0}$ | CoV  | TP   | FN   | FP   | TN   |
|-----|----------|----------|----------|------|------|------|------|------|
| 100 | 60       | 45       | 2        | 0.01 | 0.93 | 0.07 | 0.10 | 0.90 |
|     |          |          |          | 0.05 | 0.89 | 0.11 | 0.11 | 0.89 |
|     |          |          |          | 0.1  | 0.88 | 0.12 | 0.10 | 0.90 |
|     |          |          |          | 0.2  | 0.82 | 0.19 | 0.09 | 0.91 |
|     |          |          | 5        | 0.01 | 1.00 | 0.00 | 0.12 | 0.88 |
|     |          |          |          | 0.05 | 1.00 | 0.00 | 0.11 | 0.89 |
|     |          |          |          | 0.1  | 0.99 | 0.01 | 0.12 | 0.88 |
|     |          |          |          | 0.2  | 0.99 | 0.01 | 0.12 | 0.89 |
|     |          |          | 10       | 0.01 | 1.00 | 0.00 | 0.14 | 0.86 |
|     |          |          |          | 0.05 | 1.00 | 0.00 | 0.12 | 0.88 |
|     |          |          |          | 0.1  | 1.00 | 0.00 | 0.13 | 0.88 |
|     |          |          |          | 0.2  | 0.99 | 0.01 | 0.12 | 0.88 |
| m   | $n_{vI}$ | $n_{vE}$ | $n_{v0}$ | CoV  | TP   | FN   | FP   | TN   |
| 100 | 60       | 55       | 2        | 0.01 | 0.97 | 0.03 | 0.11 | 0.90 |
|     |          |          |          | 0.05 | 0.95 | 0.05 | 0.10 | 0.90 |
|     |          |          |          | 0.1  | 0.91 | 0.09 | 0.09 | 0.91 |
|     |          |          |          | 0.2  | 0.83 | 0.17 | 0.10 | 0.90 |
|     |          |          | 5        | 0.01 | 1.00 | 0.00 | 0.10 | 0.90 |
|     |          |          |          | 0.05 | 1.00 | 0.00 | 0.11 | 0.89 |
|     |          |          |          | 0.1  | 0.99 | 0.01 | 0.08 | 0.92 |
|     |          |          |          | 0.2  | 0.98 | 0.02 | 0.08 | 0.92 |
|     |          |          | 10       | 0.01 | 1.00 | 0.00 | 0.13 | 0.87 |
|     |          |          |          | 0.05 | 1.00 | 0.00 | 0.11 | 0.89 |
|     |          |          |          | 0.1  | 1.00 | 0.00 | 0.11 | 0.89 |
|     |          |          |          | 0.2  | 1.00 | 0.00 | 0.11 | 0.89 |
| m   | $n_{vI}$ | $n_{vE}$ | $n_{v0}$ | CoV  | TP   | FN   | FP   | TN   |
| 100 | 55       | 55       | 2        | 0.01 | 0.84 | 0.16 | 0.10 | 0.90 |
|     |          |          |          | 0.05 | 0.83 | 0.17 | 0.11 | 0.90 |
|     |          |          |          | 0.1  | 0.80 | 0.20 | 0.09 | 0.91 |
|     |          |          |          | 0.2  | 0.72 | 0.28 | 0.10 | 0.90 |
|     |          |          | 5        | 0.01 | 0.98 | 0.02 | 0.13 | 0.87 |
|     |          |          |          | 0.05 | 0.98 | 0.02 | 0.14 | 0.86 |
|     |          |          |          | 0.1  | 0.97 | 0.04 | 0.13 | 0.87 |
|     |          |          |          | 0.2  | 0.93 | 0.07 | 0.11 | 0.89 |
|     |          |          | 10       | 0.01 | 1.00 | 0.00 | 0.14 | 0.86 |
|     |          |          |          | 0.05 | 1.00 | 0.00 | 0.13 | 0.87 |
|     |          |          |          | 0.1  | 1.00 | 0.00 | 0.14 | 0.86 |
|     |          |          |          | 0.2  | 0.99 | 0.01 | 0.13 | 0.87 |
| m   | $n_{vI}$ | $n_{vE}$ | $n_{v0}$ | CoV  | TP   | FN   | FP   | TN   |
| 100 | 65       | 45       | 2        | 0.01 | 0.95 | 0.05 | 0.10 | 0.90 |
|     |          |          |          | 0.05 | 0.93 | 0.07 | 0.11 | 0.90 |
|     |          |          |          | 0.1  | 0.90 | 0.11 | 0.10 | 0.90 |
|     |          |          |          | 0.2  | 0.81 | 0.19 | 0.08 | 0.92 |
|     |          |          | 5        | 0.01 | 1.00 | 0.00 | 0.12 | 0.88 |
|     |          |          |          | 0.05 | 1.00 | 0.00 | 0.11 | 0.90 |
|     |          |          |          | 0.1  | 1.00 | 0.00 | 0.10 | 0.90 |
|     |          |          |          | 0.2  | 0.98 | 0.02 | 0.10 | 0.90 |
|     |          |          | 10       | 0.01 | 1.00 | 0.00 | 0.09 | 0.91 |
|     |          |          |          | 0.05 | 1.00 | 0.00 | 0.12 | 0.88 |

|                            |                       |                       |                          |            |           |           |           |           |
|----------------------------|-----------------------|-----------------------|--------------------------|------------|-----------|-----------|-----------|-----------|
|                            |                       |                       |                          | 0.1        | 1.00      | 0.00      | 0.11      | 0.89      |
|                            |                       |                       |                          | 0.2        | 1.00      | 0.00      | 0.10      | 0.90      |
| <b>n<sub>species</sub></b> | <b>n<sub>vI</sub></b> | <b>n<sub>vE</sub></b> | <b>n<sub>vOmit</sub></b> | <b>CoV</b> | <b>TP</b> | <b>FN</b> | <b>FP</b> | <b>TN</b> |
| 50                         | 30                    | 25                    | 2                        | 0.01       | 0.86      | 0.14      | 0.11      | 0.89      |
|                            |                       |                       |                          | 0.05       | 0.82      | 0.18      | 0.10      | 0.90      |
|                            |                       |                       |                          | 0.1        | 0.75      | 0.25      | 0.09      | 0.91      |
|                            |                       |                       |                          | 0.2        | 0.69      | 0.31      | 0.09      | 0.91      |
|                            |                       |                       | 5                        | 0.01       | 0.99      | 0.01      | 0.10      | 0.90      |
|                            |                       |                       |                          | 0.05       | 0.98      | 0.02      | 0.10      | 0.90      |
|                            |                       |                       |                          | 0.1        | 0.97      | 0.03      | 0.10      | 0.90      |
|                            |                       |                       |                          | 0.2        | 0.92      | 0.08      | 0.11      | 0.89      |
|                            |                       |                       | 10                       | 0.01       | 1.00      | 0.00      | 0.10      | 0.90      |
|                            |                       |                       |                          | 0.05       | 1.00      | 0.00      | 0.09      | 0.91      |
|                            |                       |                       |                          | 0.1        | 1.00      | 0.00      | 0.09      | 0.91      |
|                            |                       |                       |                          | 0.2        | 0.99      | 0.02      | 0.11      | 0.90      |
| <b>m</b>                   | <b>n<sub>vI</sub></b> | <b>n<sub>vE</sub></b> | <b>n<sub>vO</sub></b>    | <b>CoV</b> | <b>TP</b> | <b>FN</b> | <b>FP</b> | <b>TN</b> |
| 200                        | 120                   | 100                   | 2                        | 0.01       | 0.76      | 0.24      | 0.11      | 0.89      |
|                            |                       |                       |                          | 0.05       | 0.73      | 0.27      | 0.10      | 0.90      |
|                            |                       |                       |                          | 0.1        | 0.67      | 0.33      | 0.07      | 0.93      |
|                            |                       |                       |                          | 0.2        | 0.58      | 0.42      | 0.10      | 0.90      |
|                            |                       |                       | 5                        | 0.01       | 0.97      | 0.03      | 0.16      | 0.84      |
|                            |                       |                       |                          | 0.05       | 0.95      | 0.05      | 0.11      | 0.89      |
|                            |                       |                       |                          | 0.1        | 0.94      | 0.07      | 0.13      | 0.87      |
|                            |                       |                       |                          | 0.2        | 0.88      | 0.12      | 0.13      | 0.88      |
|                            |                       |                       | 10                       | 0.01       | 1.00      | 0.00      | 0.15      | 0.85      |
|                            |                       |                       |                          | 0.05       | 0.99      | 0.01      | 0.16      | 0.84      |
|                            |                       |                       |                          | 0.1        | 1.00      | 0.01      | 0.13      | 0.87      |
|                            |                       |                       |                          | 0.2        | 0.98      | 0.02      | 0.15      | 0.85      |
|                            |                       |                       | 20                       | 0.01       | 1.00      | 0.00      | 0.14      | 0.86      |
|                            |                       |                       |                          | 0.05       | 1.00      | 0.00      | 0.14      | 0.86      |
|                            |                       |                       |                          | 0.1        | 1.00      | 0.00      | 0.15      | 0.86      |
|                            |                       |                       |                          | 0.2        | 1.00      | 0.00      | 0.14      | 0.86      |

**Table S4** Case study II: Performance of RESET tests on homoscedastic data (values represent rates).

| <i>m</i> | <i>n<sub>vI</sub></i> | <i>n<sub>vE</sub></i> | <i>n<sub>v0</sub></i> | CoV <sup>a</sup> | RESET test (p = 1) |      |      |      | RESET test (p = 2) |      |      |      |
|----------|-----------------------|-----------------------|-----------------------|------------------|--------------------|------|------|------|--------------------|------|------|------|
|          |                       |                       |                       |                  | TP                 | FN   | FP   | TN   | TP                 | FN   | FP   | TN   |
| 100      | 60                    | 50                    | 2                     | 0.01             | 0.09               | 0.91 | 0.05 | 0.95 | 0.21               | 0.79 | 0.05 | 0.95 |
|          |                       |                       |                       | 0.05             | 0.08               | 0.92 | 0.04 | 0.96 | 0.19               | 0.81 | 0.05 | 0.95 |
|          |                       |                       |                       | 0.1              | 0.08               | 0.92 | 0.05 | 0.95 | 0.20               | 0.80 | 0.06 | 0.94 |
|          |                       |                       |                       | 0.2              | 0.07               | 0.93 | 0.04 | 0.96 | 0.17               | 0.83 | 0.05 | 0.95 |
|          | 5                     |                       |                       | 0.01             | 0.09               | 0.91 | 0.04 | 0.96 | 0.29               | 0.71 | 0.05 | 0.95 |
|          |                       |                       |                       | 0.05             | 0.10               | 0.90 | 0.04 | 0.96 | 0.31               | 0.69 | 0.04 | 0.96 |
|          |                       |                       |                       | 0.1              | 0.11               | 0.89 | 0.06 | 0.94 | 0.30               | 0.71 | 0.05 | 0.95 |
|          |                       |                       |                       | 0.2              | 0.10               | 0.90 | 0.04 | 0.96 | 0.30               | 0.70 | 0.04 | 0.96 |
|          | 10                    |                       |                       | 0.01             | 0.12               | 0.88 | 0.06 | 0.94 | 0.41               | 0.59 | 0.05 | 0.95 |
|          |                       |                       |                       | 0.05             | 0.11               | 0.89 | 0.05 | 0.96 | 0.42               | 0.58 | 0.04 | 0.96 |
|          |                       |                       |                       | 0.1              | 0.11               | 0.89 | 0.05 | 0.95 | 0.41               | 0.59 | 0.06 | 0.94 |
|          |                       |                       |                       | 0.2              | 0.13               | 0.87 | 0.06 | 0.94 | 0.43               | 0.57 | 0.05 | 0.95 |

<sup>a</sup>*In silico* were generated in the same manner as in Case Study II, but using independent and identically distributed Gaussian noise with a constant variance (i.e. homoscedastic noise) at the specified CoV.

**Table S5** Case study III: Iterative procedure for resolving model misspecification in the CHO model ( $k = 2$ ).

| <b>k</b> | <b>n<sub>extra</sub></b> | <b>n<sub>omit</sub></b> | <b>Number of remaining reactions<sup>a</sup></b> |                          |
|----------|--------------------------|-------------------------|--------------------------------------------------|--------------------------|
|          |                          |                         | <b>Extra reactions</b>                           | <b>Omitted reactions</b> |
| 2        | 5                        | 5                       | 0                                                | 0                        |
|          | 8                        | 8                       | 0                                                | 0                        |

<sup>a</sup>The number of remaining reactions corresponds to the average over 100 generations of the stoichiometric matrix  $\mathbf{S}_{\mathbf{l},\text{true}}$ , of the median number across 100 in silico data simulations.
